# Supplementary material
Source: publisher figshare collection journal article supplement (https://gsajournals.figshare.com/ndownloader/files/15090269)
Supplement: Supplementary file 1 [file 15090269]

## Sheet: Sheet1
File S6. Interaction partners of VE-2::sGFP fusion in N. crassa
Accession	Description	Score	Coverage	# Proteins	# Unique Peptides	# Peptides	# PSMs	# AAs	MW [kDa]	calc. pI
NCU02775T0	NCU02775 | Neurospora crassa OR74A hypothetical protein (471 aa)	127.59	51.91	1	16	16	37	470	50.9594	7.15186
NCU01731T0	NCU01731 | Neurospora crassa OR74A velvetA-like-1 (555 aa)	62.0008	37.73	1	13	13	17	554	61.5503	8.93896
NCU07697T0	NCU07697 | Neurospora crassa OR74A tricarboxylic acid-4 (380 aa)	12.3643	22.43	1	6	6	6	379	40.9603	7.41553
NCU05964T0	NCU05964 | Neurospora crassa OR74A developmental regulator VosA (448 aa)	18.4215	19.91	1	5	5	9	447	48.48	8.49951
NCU06578T0	NCU06578 | Neurospora crassa OR74A KapG (1032 aa)	13.9748	9.8	1	5	5	5	1031	114.3	4.69092
NCU03515T0	NCU03515 | Neurospora crassa OR74A cell division control protein 10 (338 aa)	11.4483	20.18	1	5	5	5	337	38.6338	7.59131
NCU08920T0	NCU08920 | Neurospora crassa OR74A ATP-binding cassette sub-family F member 2 (614 aa)	9.01112	12.4	1	5	5	5	613	68.2785	7.00537
NCU00493T0	NCU00493 | Neurospora crassa OR74A coatomer subunit delta (513 aa)	10.0935	15.63	1	4	4	4	512	56.67	5.16064
NCU02397T0	NCU02397 | Neurospora crassa OR74A isoleucine-valine-5 (577 aa)	7.76063	10.42	1	4	4	4	576	64.2045	5.74463
NCU08095T0	NCU08095 | Neurospora crassa OR74A hypothetical protein (246 aa)	3.09497	16.73	1	4	4	5	245	27.8354	5.36377
NCU06457T0	NCU06457 | Neurospora crassa OR74A asparaginyl-tRNA synthetase (581 aa)	7.73678	8.45	1	3	3	3	580	66.1007	6.17627
NCU01021T0	NCU01021 | Neurospora crassa OR74A eukaryotic translation initiation factor 3 subunit EifCf (370 aa)	7.49359	11.11	1	3	3	3	369	39.67	4.99561
NCU06361T0	NCU06361 | Neurospora crassa OR74A cwl1 (330 aa)	5.73997	16.72	2	3	3	3	329	35.7226	6.96143
NCU02374T0	NCU02374 | Neurospora crassa OR74A regulatory particle, non-ATPase-like-9 (382 aa)	1.83221	9.97	1	3	3	3	381	43.8346	5.50342
NCU00793T0	NCU00793 | Neurospora crassa OR74A trehalose phosphate synthase (930 aa)	7.42484	3.12	1	2	2	3	929	105.098	7.12256
NCU07451T0	NCU07451 | Neurospora crassa OR74A methionyl-tRNA synthetase (664 aa)	6.78475	5.58	1	2	2	2	663	74.2728	6.31592
NCU02391T0	NCU02391 | Neurospora crassa OR74A protein transporter sec-24 (951 aa)	5.49193	2.74	1	2	2	2	950	103.465	6.31592
NCU03870T1	NCU03870 | Neurospora crassa OR74A hypothetical protein (734 aa)	5.3589	5.05	2	2	2	2	733	74.8608	4.67822
NCU04857T0	NCU04857 | Neurospora crassa OR74A 2-hydroxyacid dehydrogenase (428 aa)	5.06146	7.49	1	2	2	2	427	47.5224	7.79639
NCU09212T1	NCU09212 | Neurospora crassa OR74A calcium/calmodulin-dependent kinase-4 (613 aa)	3.70552	8.5	2	2	2	2	612	68.5959	7.94287
NCU02455T0	NCU02455 | Neurospora crassa OR74A FKBP-type peptidyl-prolyl cis-trans isomerase (218 aa)	4.58702	14.75	1	1	1	1	217	22.9007	4.85596
NCU11381T0	NCU11381 | Neurospora crassa OR74A diphosphomevalonate decarboxylase (395 aa)	4.2955	5.08	1	1	1	2	394	41.5638	5.47803
NCU07474T0	NCU07474 | Neurospora crassa OR74A ergot alkaloid biosynthetic protein A (337 aa)	4.00926	4.46	1	1	1	1	336	37.1686	6.66846
NCU07542T0	NCU07542 | Neurospora crassa OR74A rad23-like (384 aa)	3.62744	4.96	1	1	1	1	383	39.9618	4.57666
NCU05885T0	NCU05885 | Neurospora crassa OR74A flavin-binding monooxygenase (679 aa)	3.31206	2.95	1	1	1	1	678	76.3217	7.31299
NCU00768T0	NCU00768 | Neurospora crassa OR74A mRNA binding post-transcriptional regulator (392 aa)	3.13131	3.58	1	1	1	1	391	42.1503	7.51807
NCU11259T0	NCU11259 | Neurospora crassa OR74A hypothetical protein (345 aa)	2.84693	5.81	1	1	1	1	344	36.1117	6.15088
NCU10273T0	NCU10273 | Neurospora crassa OR74A Hsc70 cochaperone (366 aa)	2.72641	3.29	1	1	1	1	365	36.9717	5.13525
NCU02602T0	NCU02602 | Neurospora crassa OR74A hypothetical protein (81 aa)	2.65405	17.5	1	1	1	1	80	8.50832	10.0083
NCU07446T0	NCU07446 | Neurospora crassa OR74A vacuolar membrane ATPase-4 (231 aa)	2.62882	4.35	1	1	1	1	230	25.7322	5.79541
NCU09237T0	NCU09237 | Neurospora crassa OR74A KH domain RNA binding protein (482 aa)	2.49234	2.7	1	1	1	1	481	50.4515	7.1665
NCU03749T4	NCU03749 | Neurospora crassa OR74A hydroxyacylglutathione hydrolase (283 aa)	2.3871	5.32	1	1	1	1	282	31.3177	7.89893
NCU04266T0	NCU04266 | Neurospora crassa OR74A hypothetical protein (92 aa)	2.20751	15.38	1	1	1	1	91	9.55769	5.0083
